# Supplementary material for: Amiloride-sensitive channels in type I fungiform taste cells in mouse
Source: Springer Nature journal article supplement (doi:10.1186/1471-2202-9-1), 2008-01-02
Supplement: 12868_2007_684_MOESM3_ESM.pdf [file 12868_2007_684_MOESM3_ESM.pdf]

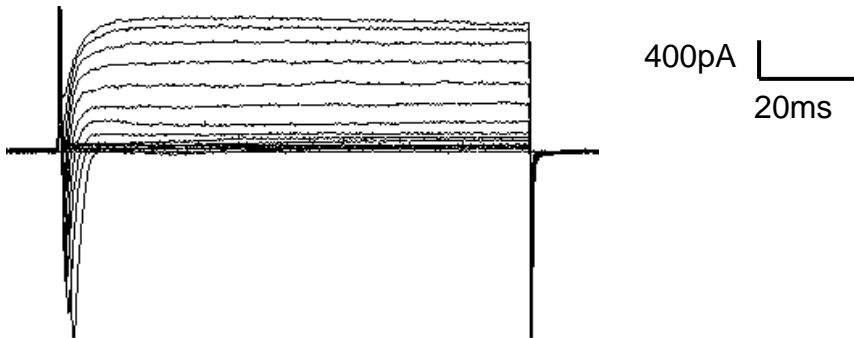

**Ba-TEA-TTX**

This figure displays a series of electrophysiological traces showing current responses to a voltage step in the presence of Ba-TEA-TTX. The traces are arranged vertically, with the most prominent response at the top. The voltage step is indicated by a horizontal line that steps up and then returns to baseline. The current responses show a rapid rise to a steady-state level during the step, followed by a rapid decay upon step termination. The traces are inverted relative to the top figure, with the most prominent response at the top. The text "Ba-TEA-TTX" is centered above the traces.
