# Supplementary material for: Amiloride-sensitive channels in type I fungiform taste cells in mouse
Source: Springer Nature journal article supplement (doi:10.1186/1471-2202-9-1), 2008-01-02

**A**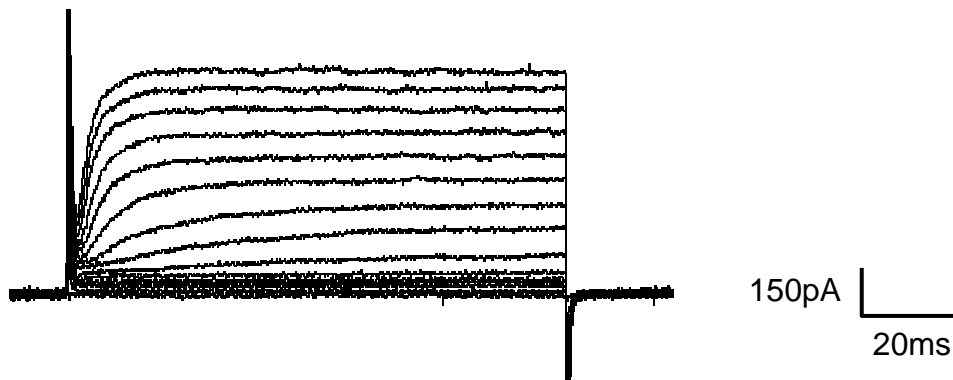**B**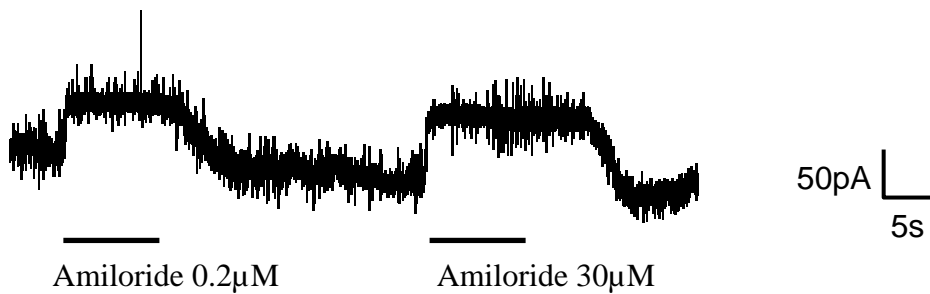

Supplement: 12868_2007_684_MOESM4_ESM.pdf [file 12868_2007_684_MOESM4_ESM.pdf]
